# Supplementary material for: Graphene nanosheets encapsulated α-MoO3 nanoribbons with ultrahigh lithium ion storage properties
Source: Royal Society of Chemistry journal article supplement (doi:10.1039/c4ce00252k), 2014-01-01
Supplement: c4ce00252k1.pdf [file c4ce00252k1.pdf]

## Graphene nanosheets encapsulated $\alpha$ -MoO<sub>3</sub> nanoribbons with ultrahigh lithium ion storage properties

Pei-Jie Lu *a, b*, Ming Lei *c*, Jun Liu \* *a, b*

*a* School of Materials Science and Engineering, Central South University, Changsha, Hunan, 410083, China

*b* Key Laboratory of Nonferrous Metal Materials Science and Engineering, Ministry of Education, Central South University, Changsha 410083, Hunan, China

*c* State Key Laboratory of Information Photonics and Optical Communications, Beijing University of Posts and Telecommunications, Beijing 100876, China

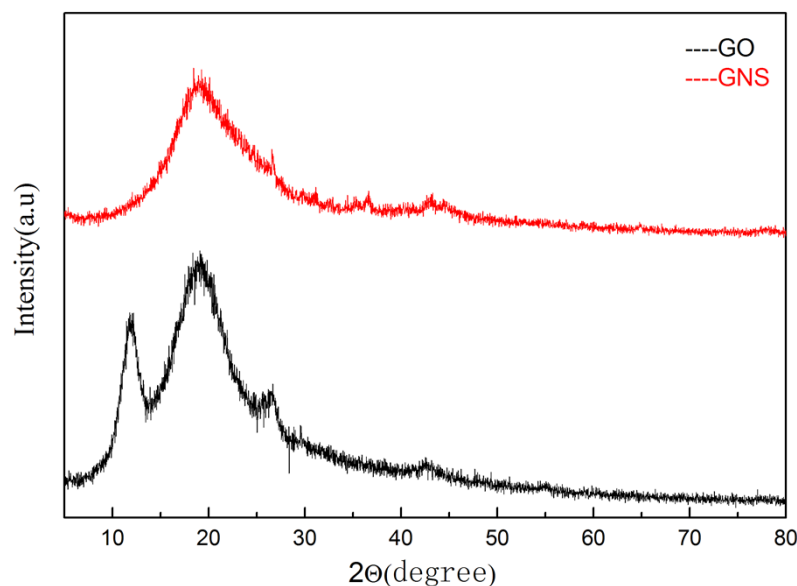

**Figure S1** X-ray diffraction pattern of graphene nanosheets and graphite oxide nanosheets.

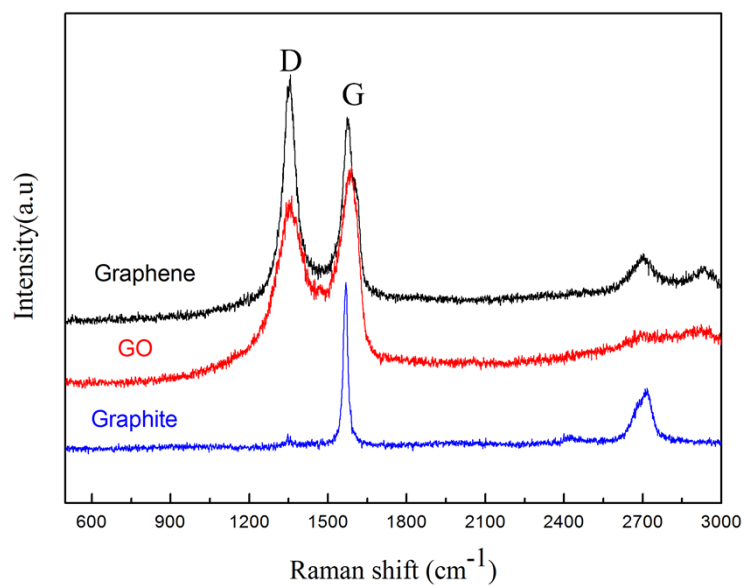

**Figure S2** Evolution of the Raman spectra during the oxidation and reduction processes for graphite and GO.

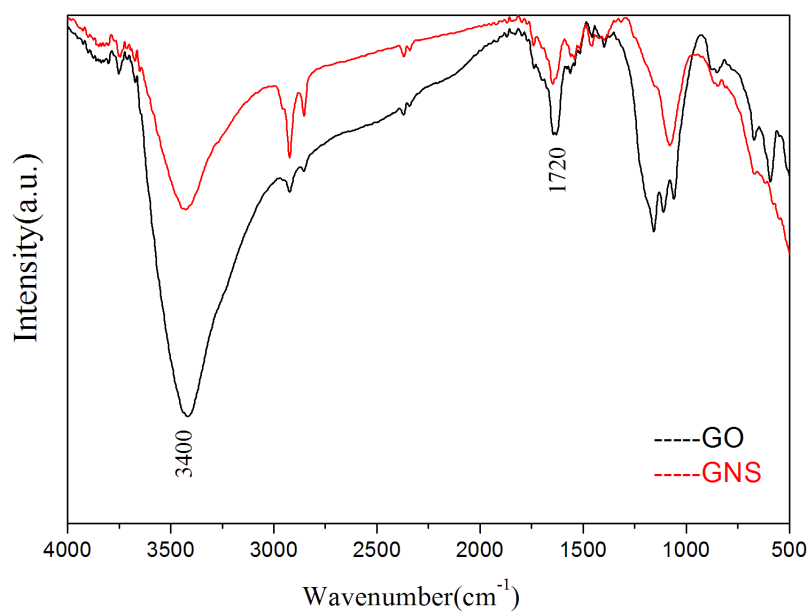

**Figure S3** FT-IR spectra of GO and GNS.
